# Supplementary material
Source: HighWire-hosted journal article supplement (https://genome.cshlp.org/content/suppl/2004/03/11/14.4.623)
Supplement: Tufarelli-21436_supp.pdf [file Tufarelli-21436_supp.pdf]

### Tufarelli\_BTR homology plot enlargement

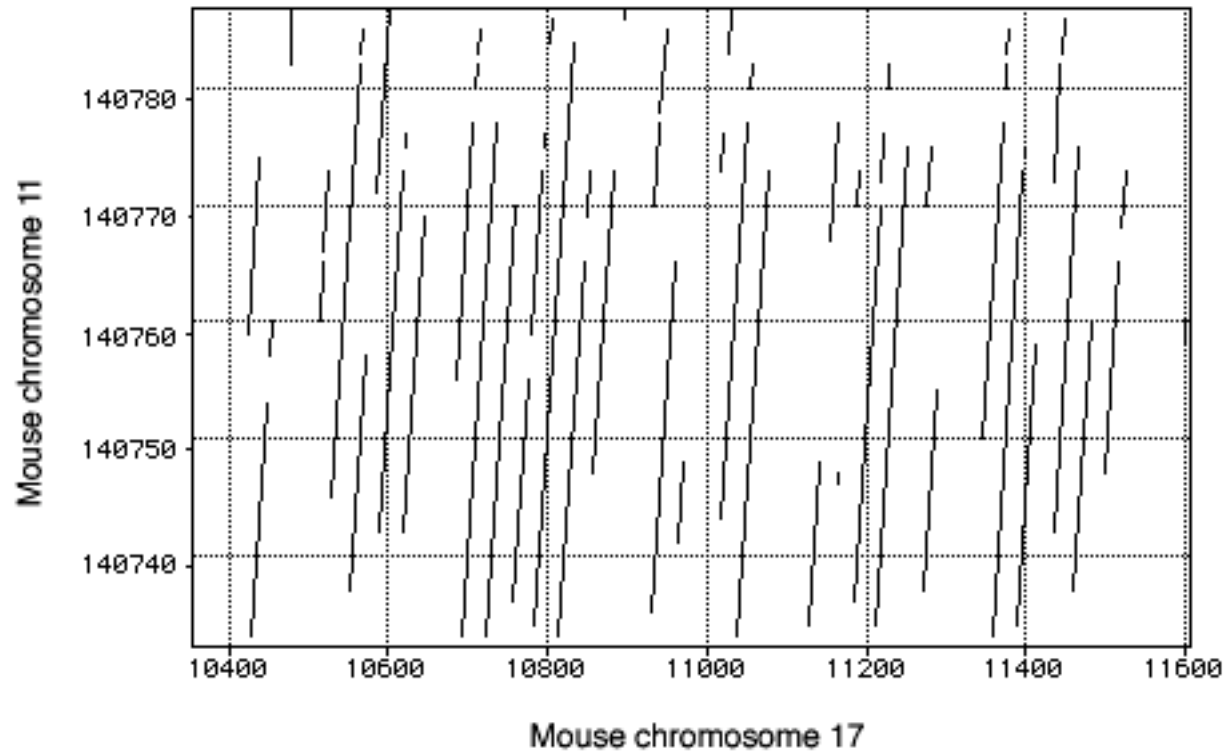

Enlargement of the dot plot region between co-ordinates 140738 and 140788 of mouse chromosome 11 against co-ordinates 10350 and 11600 of mouse chromosome 17. This shows that at higher resolution the two dark rectangles in Figure 3B are composed of a short diagonal for each 30-mer repeat unit constituting the BTRs.
